# Supplementary material for: High-throughput metabolomics enables metabolite biomarkers and metabolic mechanism discovery of fish in response to alkalinity stress
Source: Royal Society of Chemistry journal article supplement (doi:10.1039/c8ra01317a), 2018-01-01
Supplement: c8ra01317a1.pdf [file c8ra01317a1.pdf]

**Table S1.** Biomarkers of CC after exposure to alkalinity stress identified by UPLC-MS metabolomics

| No | VIP     | Retention time (min) | m/z      | Compound ID | Adducts | Formula                                         | Mass Error (ppm) | Description        | Anova (p) |
|----|---------|----------------------|----------|-------------|---------|-------------------------------------------------|------------------|--------------------|-----------|
| 1  | 14.7371 | 1.65                 | 122.0269 | HMDB00574   | M+H     | C <sub>3</sub> H <sub>7</sub> NO <sub>2</sub> S | -1.69            | L-Cysteine         | 0.0000    |
| 2  | 11.4794 | 7.48                 | 182.0817 | HMDB00158   | M+H     | C <sub>9</sub> H <sub>11</sub> NO <sub>3</sub>  | 1.12             | L-Tyrosine         | 0.0025    |
| 3  | 10.8457 | 2.77                 | 165.0557 | HMDB00205   | M+H     | C <sub>9</sub> H <sub>8</sub> O <sub>3</sub>    | 0.81             | Phenylpyruvic acid | 0.0098    |
| 4  | 13.4087 | 3.72                 | 101.0240 | HMDB00060   | M-H     | C <sub>4</sub> H <sub>6</sub> O <sub>3</sub>    | -1.68            | Acetoacetic acid   | 0.0093    |
| 5  | 11.9287 | 5.18                 | 175.0239 | HMDB00243   | M-H     | C <sub>3</sub> H <sub>4</sub> O <sub>3</sub>    | -2.10            | Pyruvic acid       | 0.0001    |
| 6  | 11.7770 | 2.64                 | 164.0859 | HMDB00159   | M-H     | C <sub>9</sub> H <sub>9</sub> NO <sub>2</sub>   | -1.41            | L-Phenylalanine    | 0.0017    |
| 7  | 9.45105 | 1.76                 | 104.0499 | HMDB00187   | M-H     | C <sub>3</sub> H <sub>5</sub> NO <sub>3</sub>   | 0.33             | L-Serine           | 0.0048    |

**Table S2.** Result from pathway analysis on alkalinity exposure group.

| No. | Name                                                | Total | Expected | Hits | Raw p    | Impact  |
|-----|-----------------------------------------------------|-------|----------|------|----------|---------|
| 1   | Phenylalanine, tyrosine and tryptophan biosynthesis | 4     | 0.020911 | 3    | 3.50E-07 | 1       |
| 2   | Phenylalanine metabolism                            | 11    | 0.057506 | 3    | 1.42E-05 | 0.64815 |
| 3   | Aminoacyl-tRNA biosynthesis                         | 67    | 0.35026  | 4    | 0.000179 | 0.10256 |
| 4   | Cysteine and methionine metabolism                  | 29    | 0.15161  | 3    | 0.000302 | 0.1956  |
| 5   | Glycine, serine and threonine metabolism            | 31    | 0.16206  | 3    | 0.00037  | 0.22606 |
| 6   | Butanoate metabolism                                | 22    | 0.11501  | 2    | 0.005151 | 0.10145 |
| 7   | Ubiquinone and other terpenoid-quinone biosynthesis | 3     | 0.015683 | 1    | 0.015613 | 0       |
| 8   | Tyrosine metabolism                                 | 44    | 0.23002  | 2    | 0.019959 | 0.13743 |
| 9   | Synthesis and degradation of ketone bodies          | 5     | 0.026139 | 1    | 0.025905 | 0.6     |
| 10  | Cyanoamino acid metabolism                          | 6     | 0.031367 | 1    | 0.031017 | 0       |
| 11  | Taurine and hypotaurine metabolism                  | 7     | 0.036594 | 1    | 0.036105 | 0       |
| 12  | Thiamine metabolism                                 | 7     | 0.036594 | 1    | 0.036105 | 0       |
| 13  | Sulfur metabolism                                   | 9     | 0.04705  | 1    | 0.046213 | 0.04167 |
| 14  | Methane metabolism                                  | 9     | 0.04705  | 1    | 0.046213 | 0.4     |
| 15  | Valine, leucine and isoleucine biosynthesis         | 13    | 0.067961 | 1    | 0.066158 | 0       |
| 16  | Pantothenate and CoA biosynthesis                   | 15    | 0.078417 | 1    | 0.075995 | 0       |
| 17  | Citrate cycle (TCA cycle)                           | 20    | 0.10456  | 1    | 0.1002   | 0.07184 |
| 18  | Sphingolipid metabolism                             | 21    | 0.10978  | 1    | 0.10498  | 0       |
| 19  | Pyruvate metabolism                                 | 22    | 0.11501  | 1    | 0.10973  | 0.17409 |
| 20  | Alanine, aspartate and glutamate metabolism         | 24    | 0.12547  | 1    | 0.11917  | 0       |
| 21  | Glutathione metabolism                              | 26    | 0.13592  | 1    | 0.12853  | 0.00371 |
| 22  | Glycolysis or Gluconeogenesis                       | 26    | 0.13592  | 1    | 0.12853  | 0.09956 |
| 23  | Valine, leucine and isoleucine degradation          | 38    | 0.19866  | 1    | 0.1829   | 0       |

**Table S3.** Integrated pathway analysis of the differentially expressed metabolites related to alkalinity stress.

| No. | Ingenuity Canonical Pathways                             | <b>-log(p-value)</b> | <b>Ratio</b> | <b>Molecules</b>                               |
|-----|----------------------------------------------------------|----------------------|--------------|------------------------------------------------|
| 1   | tRNA Charging                                            | 8.24                 | 0.0488       | L-phenylalanine,L-serine,L-tyrosine,L-cysteine |
| 2   | L-cysteine Degradation II                                | 6.08                 | 0.4          | pyruvic acid,L-cysteine                        |
| 3   | Superpathway of Methionine Degradation                   | 6.08                 | 0.0455       | pyruvic acid,L-serine,L-cysteine               |
| 4   | L-serine Degradation                                     | 5.9                  | 0.333        | pyruvic acid,L-serine                          |
| 5   | Tyrosine Biosynthesis IV                                 | 5.76                 | 0.286        | L-phenylalanine,L-tyrosine                     |
| 6   | Cysteine Biosynthesis/Homocysteine Degradation           | 5.63                 | 0.25         | L-serine,L-cysteine                            |
| 7   | L-cysteine Degradation III                               | 5.52                 | 0.222        | pyruvic acid,L-cysteine                        |
| 8   | L-cysteine Degradation I                                 | 5.34                 | 0.182        | pyruvic acid,L-cysteine                        |
| 9   | Phenylalanine Degradation I (Aerobic)                    | 5.34                 | 0.182        | L-phenylalanine,L-tyrosine                     |
| 10  | Tyrosine Degradation I                                   | 5.12                 | 0.143        | acetoacetic acid,L-tyrosine                    |
| 11  | Glycine Betaine Degradation                              | 4.68                 | 0.087        | pyruvic acid,L-serine                          |
| 12  | Phenylalanine Degradation IV (Mammalian, via Side Chain) | 4.39                 | 0.0625       | L-phenylalanine,phenylpyruvic acid             |
| 13  | Cysteine Biosynthesis III (mammalia)                     | 4.39                 | 0.0625       | L-serine,L-cysteine                            |
| 14  | Alanine Biosynthesis III                                 | 3.03                 | 0.333        | L-cysteine                                     |
| 15  | Thio-molybdenum Cofactor Biosynthesis                    | 2.9                  | 0.25         | L-cysteine                                     |
| 16  | L-dopachrome Biosynthesis                                | 2.81                 | 0.2          | L-tyrosine                                     |
| 17  | Phosphatidylethanolamine Biosynthesis III                | 2.81                 | 0.2          | L-serine                                       |
| 18  | 4-hydroxyphenylpyruvate Biosynthesis                     | 2.81                 | 0.2          | L-tyrosine                                     |
| 19  | Glycine Biosynthesis III                                 | 2.73                 | 0.167        | pyruvic acid                                   |
| 20  | Alanine Degradation III                                  | 2.73                 | 0.167        | pyruvic acid                                   |
| 21  | Alanine Biosynthesis II                                  | 2.73                 | 0.167        | pyruvic acid                                   |
| 22  | Glycine Biosynthesis I                                   | 2.73                 | 0.167        | L-serine                                       |
| 23  | Methylglyoxal Degradation I                              | 2.6                  | 0.125        | pyruvic acid                                   |
| 24  | Taurine Biosynthesis                                     | 2.6                  | 0.125        | L-cysteine                                     |
| 25  | (S)-reticuline Biosynthesis II                           | 2.55                 | 0.111        | L-tyrosine                                     |
| 26  | Methylglyoxal Degradation VI                             | 2.55                 | 0.111        | pyruvic acid                                   |
